# Supplementary material for: A shear-thinning electrostatic hydrogel with antibacterial activity by nanoengineering of polyelectrolytes
Source: Royal Society of Chemistry journal article supplement (doi:10.1039/c9bm01386e), 2019-12-30
Supplement: c9bm01386e1.pdf [file c9bm01386e1.pdf]

## Electronic Supplementary information

### **A shear-thinning electrostatic hydrogel with antibacterial activity by nanoengineering of polyelectrolytes**

Yanhui Zhu,<sup>a</sup> Qiaojie Luo,<sup>b</sup> Hongjie Zhang,<sup>a</sup> Qiuquan Cai,<sup>a</sup> Xiaodong Li,<sup>\*b</sup> Zhiquan Shen<sup>a</sup> and Weipu Zhu<sup>\*a, c</sup>

<sup>a</sup> MOE Key Laboratory of Macromolecular Synthesis and Functionalization, Department of Polymer Science and Engineering, Zhejiang University, Hangzhou 310027, People's Republic of China. E-mail: [zhuwp@zju.edu.cn](mailto:zhuwp@zju.edu.cn)

<sup>b</sup> Department of Oral and Maxillofacial Surgery, Affiliated Stomatology Hospital, School of Medicine, Zhejiang University, Hangzhou 310006, China. E-mail: [cisarli@zju.edu.cn](mailto:cisarli@zju.edu.cn)

<sup>c</sup> Key Laboratory of Adsorption and Separation Materials & Technologies of Zhejiang Province, Hangzhou, 310027, China.

## Table of Contents of Supplementary Information

**Fig. S1**  $^1\text{H}$  NMR spectra of PEG-*b*-PCL.

**Fig. S2** GPC trace of PEG-*b*-PCL.

**Fig. S3**  $^1\text{H}$  NMR spectra of PCL-*b*-PHMG-*b*-PCL.

**Fig. S4** TEM images and hydrodynamic size distribution of micelles.

**Fig. S5** Hydrodynamic size of various mixed micelles.

**Fig. S6** The Schematic of preparation of curcumin loaded mixed micelle.

**Fig. S7** Standard curve of curcumin determined by HPLC.

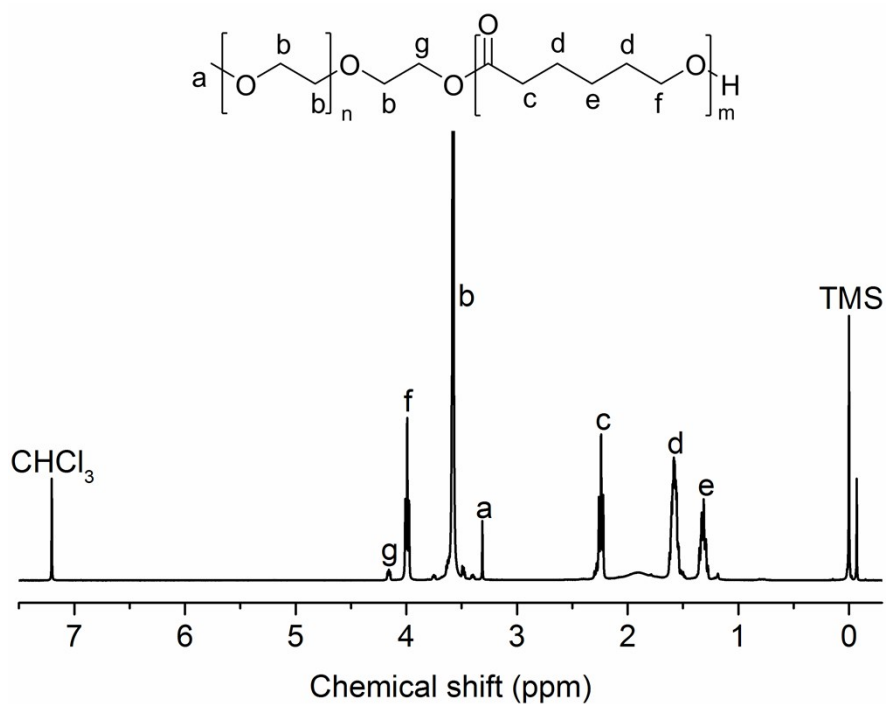

**Fig. S1**  $^1\text{H}$  NMR spectra of PEG-*b*-PCL in chloroform-*d*.

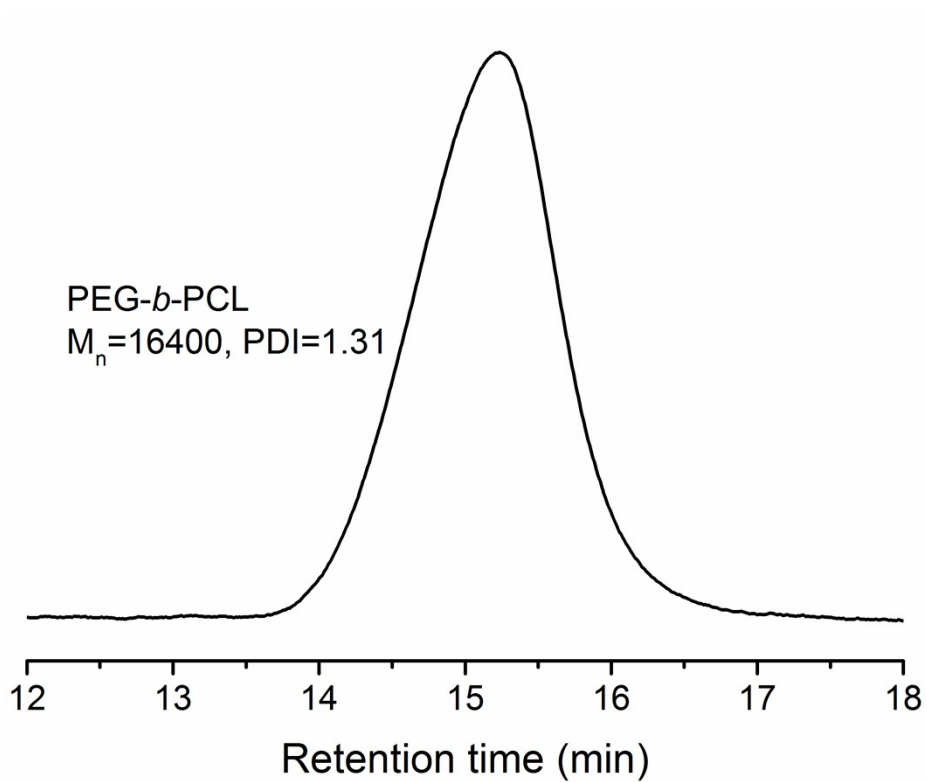

**Fig. S2** Gel permeation chromatography trace of PEG-*b*-PCL.

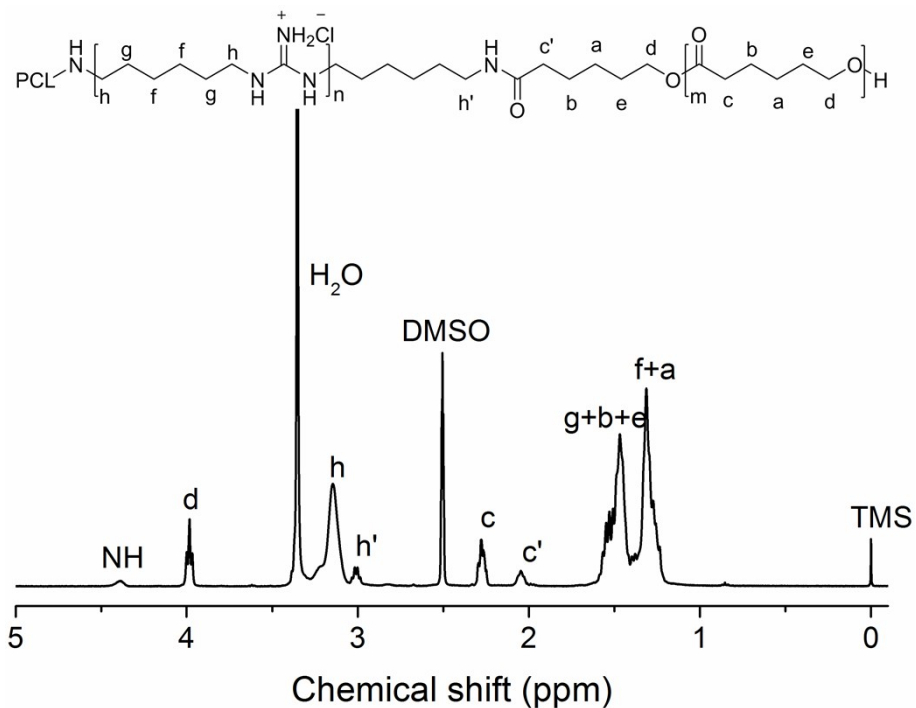

**Fig. S3**  $^1\text{H}$  NMR spectra of PCL-*b*-PHMG-*b*-PCL in  $\text{DMSO-}d_6$ .

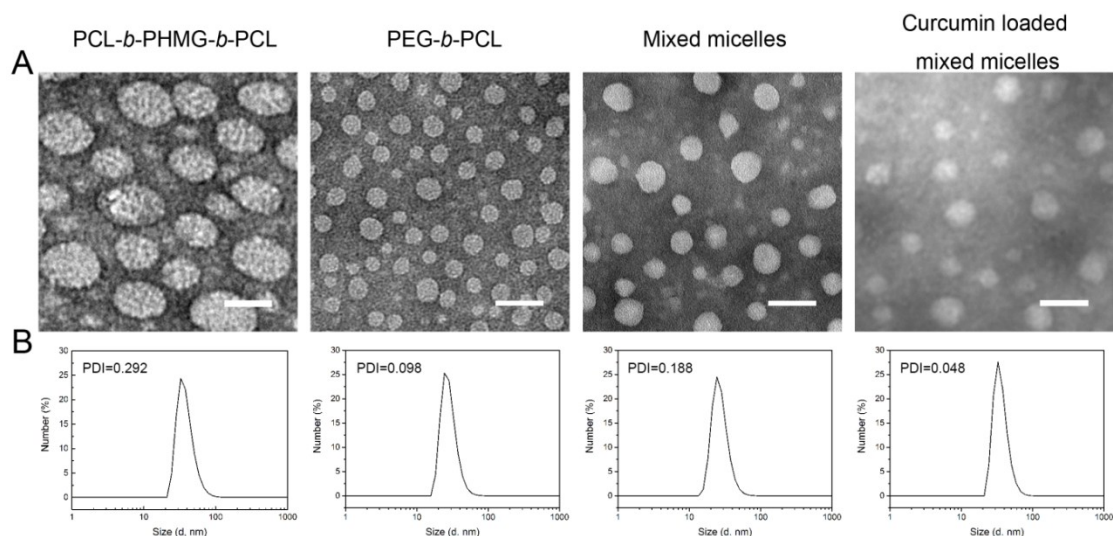

**Fig. S4** (A) Transmission electron microscopy (TEM) images of micelles. The scar bar in TEM images is 50 nm. (B) Size distribution of micelles determined by dynamic light scattering. Mixed micelles for measurement were obtained by dilution of micellar solution consisting of PEG-*b*-PCL (14 wt%) and PCL-*b*-PHMG-*b*-PCL (0.6 wt%).

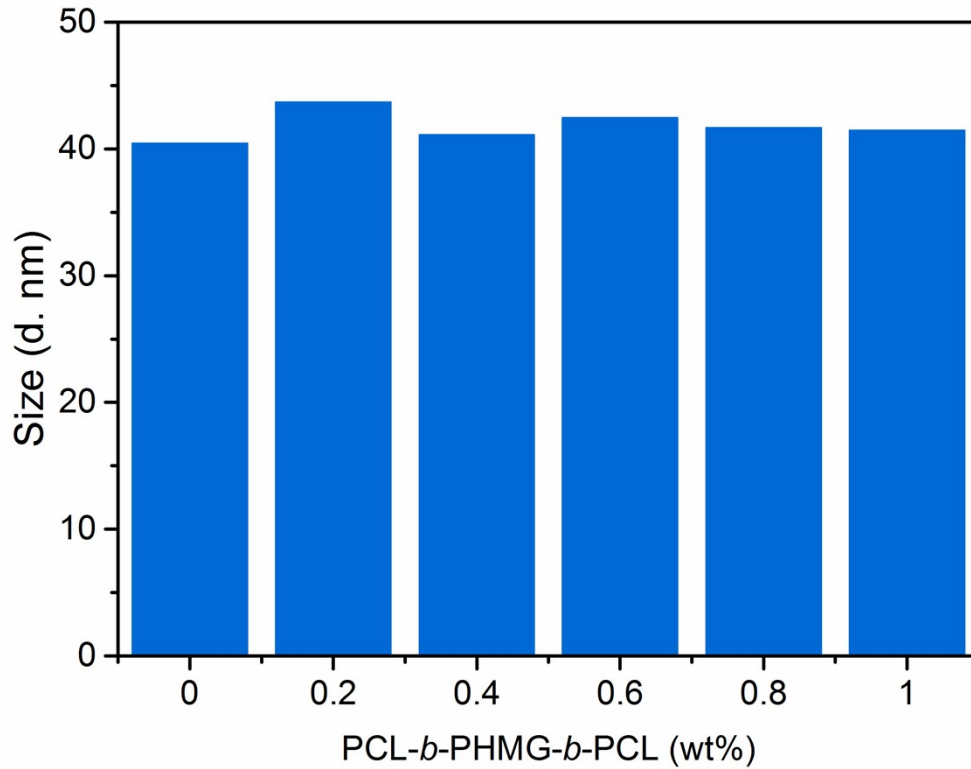

**Fig. S5** Hydrodynamic size of mixed micelles which were obtained for measurement by dilution of corresponding micellar solution containing PEG-*b*-PCL (14 wt%) and CL-*b*-PHMG-*b*-PCL (0-1 wt%).

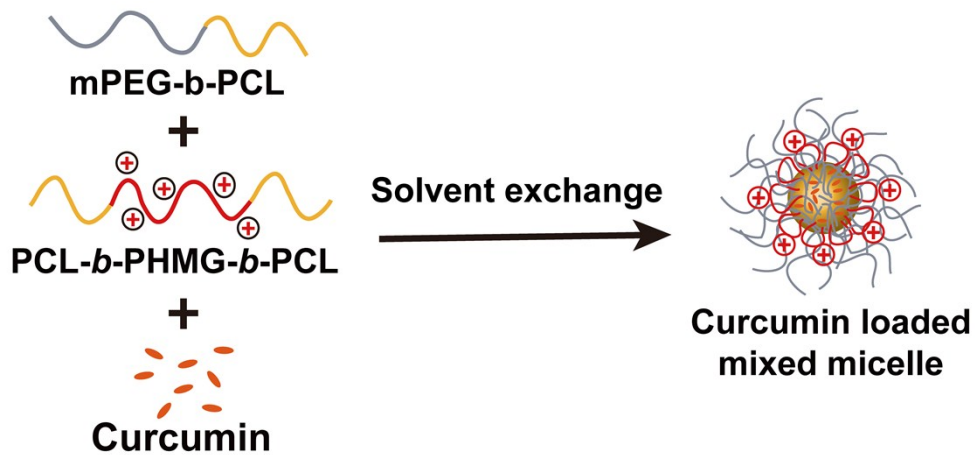

**Fig. S6** The schematic preparation of curcumin loaded mixed micelles.

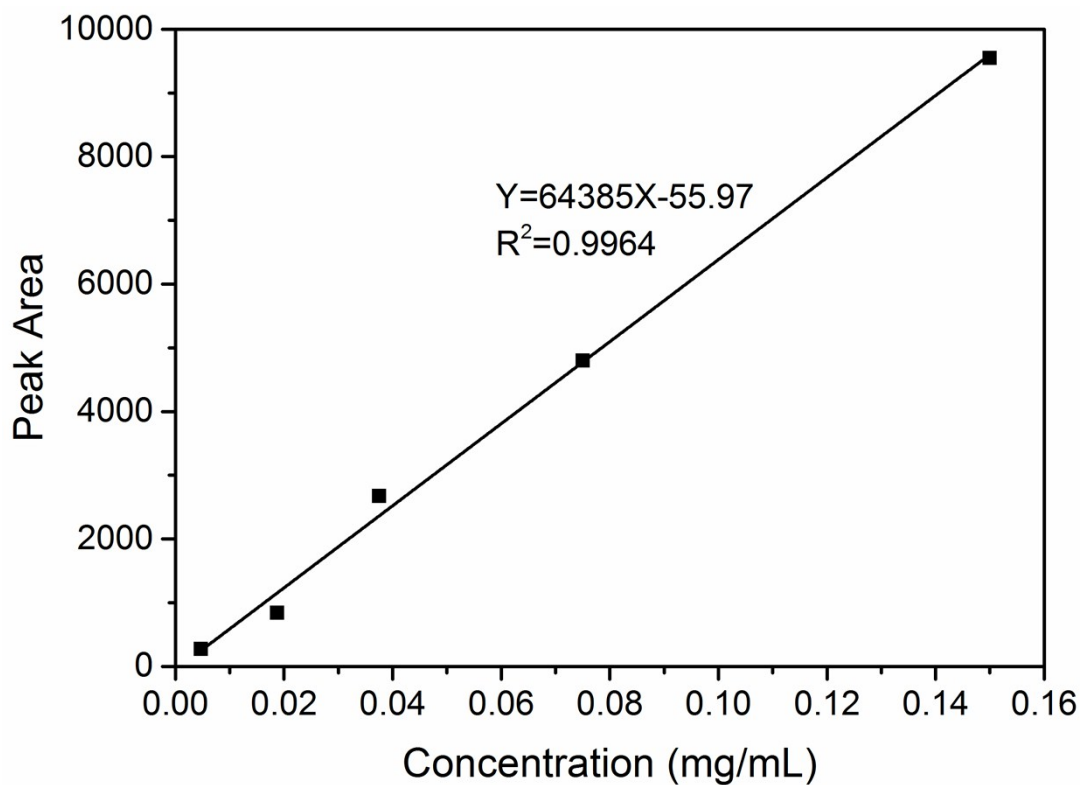

**Fig. S7** Standard curve of curcumin determined by the high-performance liquid chromatography method.

Sample concentraion: 600  $\mu\text{g}/\text{mL}$ .

Absorption area: 3565.68.

The standard equation is:  $Y = 64385X - 55.97$  (X: the concentraion of Cur, Y: the absorption peak area of Cur) and  $R^2 = 0.9964$ .

Cur concetration in sample solution: 56.2  $\mu\text{g}/\text{mL}$ . DL and EE are calculated as follows:

$$DL = \frac{56.2}{600} \times 100\% = 9.37\%$$

$$EE = \frac{9.37\%}{10\%} \times 100\% = 93.67\%$$
